# Supplementary material
Source: publisher figshare collection journal article supplement (https://karger.figshare.com/ndownloader/files/27375230)
Supplement: Supplementary file 1 [file 27375230]

**Supplementary Figure 1. ROS inactivation of fMLF and WKYMVM**

**A-B**)Neutrophils desensitized with the FPR agonists fMLF or WKYMVM (1 µM) were reactivated with GPR84 agonist Cpd51 (1 nM) to allow ROS production. Thereafter the supernatants containing the ROS-exposed compounds were collected. To determine the remaining activity of the compounds after ROS inactivation, 100 µl supernatant was immediately used to trigger the superoxide release from a new batch of naïve neutrophils. Representative supernatant-induced superoxide responses are shown in **A** and summary data are shown in **B**, mean + SEM (n = 5). Statistical analysis was analyzed by a paired Student’s *t*-test. **C-D**) As a control to **A-B,** naïve neutrophils were stimulatedwith non-ROS exposed fMLF (solid line) and WKYMVM (dashed line). Representative superoxide responses induced by control peptides were shown in **C** and summary data are shown in **D**, mean + SEM (n = 2).
